# Supplementary material for: Effect of Different Ratios of Blue and Red LED Light on Brassicaceae Microgreens under a Controlled Environment
Source: MDPI journal article supplement (doi:10.3390/plants10040801), 2021-04-19
Supplement: s1 [file s1]

**Table S1.** Effect of different blue - red light ratio in LED lighting on the bioconcentration factor of mustard microgreens.

| Treatment | BCF <sub>P</sub> | BCF <sub>K</sub> | BCF <sub>Ca</sub> | BCF <sub>Mg</sub> | BCF <sub>S</sub> | BCF <sub>Mn</sub> | BCF <sub>Fe</sub> | BCF <sub>Zn</sub> | BCF <sub>Cu</sub> |
|-----------|------------------|------------------|-------------------|-------------------|------------------|-------------------|-------------------|-------------------|-------------------|
| B0R100    | 11.66 ± 0.07 d   | 5.59 ± 0.04 d    | 2.94 ± 0.04 b     | 1.19 ± 0.03 d     | 4.55 ± 0.13 d    | 11.67 ± 0.12 c    | 3.27 ± 0.01 c     | 4.93 ± 0.03 c     | 11.47 ± 0.12 c    |
| B10R90    | 14.76 ± 0.23 c   | 7.65 ± 0.09 c    | 2.55 ± 0.06 c     | 1.58 ± 0.06 cd    | 5.54 ± 0.03 b    | 11.80 ± 0.22 c    | 3.04 ± 0.03 cd    | 5.66 ± 0.04 b     | 11.70 ± 0.08 c    |
| B25R75    | 20.08 ± 0.19 a   | 9.78 ± 0.03 a    | 3.98 ± 0.02 a     | 2.39 ± 0.01 a     | 7.13 ± 0.06 a    | 12.97 ± 0.12 b    | 3.85 ± 0.03 b     | 6.60 ± 0.05 a     | 17.41 ± 0.12 b    |
| B50R50    | 18.68 ± 0.12 b   | 8.80 ± 0.14 b    | 3.74 ± 0.03 a     | 2.04 ± 0.03 b     | 7.07 ± 0.04 a    | 15.17 ± 0.13 a    | 4.39 ± 0.03 a     | 5.58 ± 0.01 b     | 23.51 ± 0.13 a    |
| B75R25    | 13.60 ± 0.16 c   | 6.48 ± 0.03 c    | 2.59 ± 0.02 c     | 1.67 ± 0.02 c     | 4.93 ± 0.04 c    | 10.23 ± 0.15 d    | 3.05 ± 0.03 cd    | 5.16 ± 0.05 c     | 11.35 ± 0.08 c    |
| B100R0    | 11.44 ± 0.15d    | 5.86 ± 0.05 d    | 2.35 ± 0.02 cd    | 1.45 ± 0.03 cd    | 4.23 ± 0.03 d    | 8.86 ± 0.08 e     | 2.42 ± 0.02 d     | 4.04 ± 0.03 d     | 9.66 ± 0.14 d     |

B0R100, B10R90, B25R75, B50R50, B75R25, B100R0 – percentage of blue (B) and red (R) light. BCF - bioconcentration factor; P – phosphorus, K – potassium, Ca – calcium, Mg – magnesium, S – sulfur, Fe – iron, Zn – zinc, Mn – manganese, Cu – copper, B – boron. All values in the Table are expressed as mean ± standard error (n = 3). Means with different letters are significantly different at the P < 0.05 level by Tukey's honestly significant difference test.

**Table S2.** Effect of different blue - red light ratio in LED lighting on the translocation factor of mustard microgreens.

| Treatment | TF <sub>P</sub> | TF <sub>K</sub> | TF <sub>Ca</sub> | TF <sub>Mg</sub> | TF <sub>S</sub> | TF <sub>Mn</sub> | TF <sub>Fe</sub> | TF <sub>Zn</sub>   | TF <sub>Cu</sub> |
|-----------|-----------------|-----------------|------------------|------------------|-----------------|------------------|------------------|--------------------|------------------|
| B0R100    | 0.96 ± 0.01 a   | 0.82 ± 0.01 a   | 2.08 ± 0.01 c    | 2.85 ± 0.05 a    | 1.49 ± 0.06 a   | 1.73 ± 0.01 c    | 0.19 ± 0.003 f   | 0.51 ± 0.009<br>cd | 0.28 ± 0.013 c   |
| B10R90    | 0.76 ± 0.02 b   | 0.64 ± 0.01 c   | 2.49 ± 0.06 a    | 2.30 ± 0.09 c    | 1.29 ± 0.01 d   | 1.76 ± 0.04 c    | 0.26 ± 0.006 c   | 0.49 ± 0.001 d     | 0.30 ± 0.005 b   |
| B25R75    | 0.78 ± 0.02 b   | 0.67 ± 0.01 c   | 2.18 ± 0.04 c    | 2.08 ± 0.05 d    | 1.33 ± 0.02 cd  | 2.33 ± 0.07 a    | 0.24 ± 0.003 d   | 0.53 ± 0.004 c     | 0.27 ± 0.003 c   |
| B50R50    | 0.94 ± 0.02 a   | 0.77 ± 0.01 b   | 2.51 ± 0.03 a    | 2.57 ± 0.07 b    | 1.39 ± 0.01 bc  | 2.01 ± 0.04 b    | 0.21 ± 0.002 e   | 0.70 ± 0.004 a     | 0.21 ± 0.002 d   |
| B75R25    | 0.96 ± 0.03 a   | 0.79 ± 0.01 ab  | 2.61 ± 0.04 a    | 2.32 ± 0.07 c    | 1.50 ± 0.03 a   | 2.26 ± 0.05 a    | 0.28 ± 0.006 b   | 0.62 ± 0.008 b     | 0.36 ± 0.006 a   |
| B100R0    | 0.92 ± 0.03 a   | 0.79 ± 0.02 ab  | 2.35 ± 0.07 b    | 2.26 ± 0.08 cd   | 1.44 ± 0.04 ab  | 2.22 ± 0.07 a    | 0.29 ± 0.004 a   | 0.64 ± 0.015 b     | 0.35 ± 0.008 a   |

B0R100, B10R90, B25R75, B50R50, B75R25, B100R0 – percentage of blue (B) and red (R) light. TF - translocation factor; N – nitrogen, P – phosphorus, K – potassium, Ca – calcium, Mg – magnesium, S – sulfur, Fe – iron, Zn – zinc, Mn – manganese, Cu – copper, B – boron. All values in the Table are expressed as mean ± standard error (n = 3). Means with different letters are significantly different at the P < 0.05 level by Tukey's honestly significant difference test.

**Table S3.** Eigenvalue, factor scores, and contribution of the first five principal component axes to variation in mustard microgreens under different blue - red light ratio in LED lighting.

| Factors                              | F1     | F2     | F3     | F4     | F5     |
|--------------------------------------|--------|--------|--------|--------|--------|
| Eigenvalue                           | 13.632 | 4.728  | 2.889  | 1.907  | 1.515  |
| Variability (%)                      | 48.686 | 16.885 | 10.317 | 6.812  | 5.409  |
| Cumulative variability (%)           |        |        | 88.109 |        |        |
| Nitrogen                             | -0.222 | -0.162 | 0.080  | -0.281 | -0.007 |
| Phosphorus                           | 0.237  | -0.132 | -0.110 | 0.077  | -0.226 |
| Potassium                            | 0.261  | 0.079  | 0.045  | -0.015 | 0.009  |
| Calcium                              | 0.213  | -0.132 | -0.165 | 0.185  | -0.300 |
| Magnesium                            | 0.253  | -0.091 | -0.027 | 0.099  | -0.164 |
| Sulfur                               | 0.224  | -0.104 | -0.152 | 0.005  | -0.311 |
| Manganese                            | 0.251  | -0.034 | 0.037  | 0.008  | -0.169 |
| Iron                                 | 0.186  | -0.084 | 0.185  | -0.323 | 0.083  |
| Copper                               | 0.252  | -0.069 | 0.060  | -0.143 | -0.055 |
| Zinc                                 | 0.243  | -0.099 | -0.051 | -0.184 | -0.115 |
| Boron                                | 0.123  | 0.141  | -0.235 | 0.323  | 0.168  |
| Nitrates                             | -0.201 | -0.101 | 0.093  | -0.420 | -0.066 |
| Nitrites                             | -0.123 | -0.252 | -0.028 | 0.422  | 0.205  |
| Hypocotyl length                     | -0.052 | 0.428  | -0.033 | 0.108  | 0.088  |
| Root length                          | 0.167  | 0.169  | -0.098 | -0.270 | 0.002  |
| Leaf area                            | 0.096  | 0.297  | 0.253  | 0.074  | 0.199  |
| Shoot fresh weight                   | 0.048  | 0.326  | 0.296  | 0.042  | -0.073 |
| Shoot dry weight                     | -0.015 | 0.167  | 0.384  | 0.042  | -0.237 |
| Root fresh weight                    | -0.030 | -0.066 | 0.412  | 0.298  | -0.243 |
| Root dry weight                      | -0.123 | -0.180 | 0.344  | 0.204  | -0.271 |
| Chlorophyll index                    | 0.048  | -0.418 | 0.065  | 0.087  | 0.177  |
| Flavonols index                      | -0.055 | -0.367 | 0.094  | -0.010 | 0.315  |
| Anthocyanin reflectance index (ARI1) | -0.261 | -0.027 | 0.035  | 0.037  | -0.125 |
| Carotenoid reflectance index (CRI2)  | -0.258 | 0.022  | -0.008 | 0.026  | -0.158 |

|                                               |        |        |        |        |        |
|-----------------------------------------------|--------|--------|--------|--------|--------|
| Normalized difference vegetation index (NDVI) | -0.233 | -0.024 | 0.034  | -0.082 | -0.194 |
| Photochemical reflectance index (PRI)         | 0.207  | -0.092 | 0.265  | 0.014  | 0.289  |
| Plant senescence reflectance index (PSRI)     | -0.210 | -0.009 | -0.227 | -0.050 | -0.273 |
| Water band index (WBI)                        | -0.192 | 0.080  | -0.294 | 0.104  | -0.009 |

**Table S4.** Correlation matrix (Pearson (n)) of mustard microgreens under different blue - red light ratio in LED lighting.

| Variables                                     | Hypocotyl length | Root length   | Leaf area     | Shoot fresh weight | Shoot dry weight | Root fresh weight | Root dry weight | Magnesium     | Potassium     | Calcium       | Manganese     | Iron          | Copper        | Zinc          | Boron         | Phosphorus    | Sulfur        | Nitrogen      | Nitrates      | Nitrites      | Chlorophyll index | Flavonols index | Anthocyanin reflectance index (ARI1) | Carotenoid reflectance index (CRI2) | Normalized difference vegetation index (NDVI) | Photochemical reflectance index (PRI) | Plant senescence reflectance index (PSRI) | Water band index (WBI) |
|-----------------------------------------------|------------------|---------------|---------------|--------------------|------------------|-------------------|-----------------|---------------|---------------|---------------|---------------|---------------|---------------|---------------|---------------|---------------|---------------|---------------|---------------|---------------|-------------------|-----------------|--------------------------------------|-------------------------------------|-----------------------------------------------|---------------------------------------|-------------------------------------------|------------------------|
| Hypocotyl length                              | <b>1</b>         | 0.200         | <b>0.487</b>  | <b>0.572</b>       | 0.328            | -0.089            | -0.321          | -0.367        | -0.007        | -0.416        | -0.312        | -0.316        | -0.345        | -0.384        | 0.352         | -0.465        | -0.391        | -0.258        | -0.191        | -0.292        | <b>-0.834</b>     | <b>-0.645</b>   | 0.128                                | 0.225                               | 0.085                                         | -0.326                                | 0.147                                     | 0.308                  |
| Root length                                   | 0.200            | <b>1</b>      | 0.293         | 0.302              | 0.022            | -0.345            | <b>-0.640</b>   | 0.461         | <b>0.649</b>  | 0.363         | <b>0.542</b>  | 0.405         | <b>0.506</b>  | <b>0.574</b>  | 0.387         | 0.418         | 0.447         | <b>-0.540</b> | -0.377        | <b>-0.695</b> | -0.219            | -0.277          | <b>-0.617</b>                        | <b>-0.551</b>                       | -0.398                                        | 0.297                                 | -0.374                                    | -0.441                 |
| Leaf area                                     | <b>0.487</b>     | 0.293         | <b>1</b>      | <b>0.689</b>       | 0.284            | 0.123             | -0.210          | 0.167         | 0.442         | -0.068        | 0.335         | 0.122         | 0.216         | 0.021         | 0.156         | 0.052         | -0.051        | <b>-0.496</b> | -0.390        | <b>-0.488</b> | -0.409            | -0.463          | -0.386                               | -0.341                              | -0.349                                        | 0.410                                 | <b>-0.656</b>                             | -0.301                 |
| Shoot fresh weight                            | <b>0.572</b>     | 0.302         | <b>0.689</b>  | <b>1</b>           | <b>0.601</b>     | 0.230             | -0.004          | 0.043         | 0.315         | -0.148        | 0.173         | 0.132         | 0.113         | -0.029        | 0.155         | -0.098        | -0.082        | -0.309        | -0.202        | -0.447        | <b>-0.513</b>     | <b>-0.512</b>   | -0.144                               | -0.098                              | -0.147                                        | 0.179                                 | -0.337                                    | -0.149                 |
| Shoot dry weight                              | 0.328            | 0.022         | 0.284         | <b>0.601</b>       | <b>1</b>         | 0.362             | 0.449           | -0.107        | 0.086         | -0.245        | -0.047        | 0.118         | -0.044        | -0.138        | -0.054        | -0.235        | -0.128        | 0.000         | 0.047         | -0.163        | -0.302            | -0.210          | 0.088                                | 0.051                               | 0.034                                         | 0.114                                 | 0.067                                     | -0.230                 |
| Root fresh weight                             | -0.089           | -0.345        | 0.123         | 0.230              | 0.362            | <b>1</b>          | <b>0.634</b>    | 0.001         | -0.078        | -0.018        | -0.018        | 0.003         | -0.036        | -0.139        | -0.283        | -0.076        | -0.155        | 0.060         | -0.013        | 0.269         | 0.131             | 0.092           | 0.268                                | 0.210                               | 0.216                                         | 0.152                                 | -0.162                                    | -0.257                 |
| Root dry weight                               | -0.321           | <b>-0.640</b> | -0.210        | -0.004             | 0.449            | <b>0.634</b>      | <b>1</b>        | -0.286        | -0.467        | -0.231        | -0.288        | -0.212        | -0.346        | -0.406        | -0.433        | -0.274        | -0.280        | <b>0.488</b>  | 0.393         | 0.447         | 0.317             | 0.397           | <b>0.513</b>                         | 0.450                               | 0.465                                         | -0.151                                | 0.246                                     | 0.023                  |
| Magnesium                                     | -0.367           | 0.461         | 0.167         | 0.043              | -0.107           | 0.001             | -0.286          | <b>1</b>      | <b>0.866</b>  | <b>0.915</b>  | <b>0.948</b>  | <b>0.562</b>  | <b>0.859</b>  | <b>0.860</b>  | 0.367         | <b>0.963</b>  | <b>0.898</b>  | <b>-0.745</b> | <b>-0.715</b> | -0.278        | 0.325             | -0.123          | <b>-0.845</b>                        | <b>-0.848</b>                       | <b>-0.732</b>                                 | <b>0.671</b>                          | <b>-0.659</b>                             | <b>-0.647</b>          |
| Potassium                                     | -0.007           | <b>0.649</b>  | 0.442         | 0.315              | 0.086            | -0.078            | -0.467          | <b>0.866</b>  | <b>1</b>      | <b>0.655</b>  | <b>0.858</b>  | <b>0.718</b>  | <b>0.883</b>  | <b>0.843</b>  | <b>0.473</b>  | <b>0.753</b>  | <b>0.734</b>  | <b>-0.828</b> | <b>-0.736</b> | <b>-0.513</b> | 0.021             | -0.325          | <b>-0.944</b>                        | <b>-0.924</b>                       | <b>-0.828</b>                                 | <b>0.737</b>                          | <b>-0.755</b>                             | <b>-0.690</b>          |
| Calcium                                       | -0.416           | 0.363         | -0.068        | -0.148             | -0.245           | -0.018            | -0.231          | <b>0.915</b>  | <b>0.655</b>  | <b>1</b>      | <b>0.837</b>  | 0.303         | <b>0.705</b>  | <b>0.758</b>  | 0.396         | <b>0.967</b>  | <b>0.915</b>  | <b>-0.680</b> | <b>-0.682</b> | -0.153        | 0.321             | -0.103          | <b>-0.673</b>                        | <b>-0.664</b>                       | <b>-0.589</b>                                 | 0.410                                 | -0.414                                    | -0.449                 |
| Manganese                                     | -0.312           | <b>0.542</b>  | 0.335         | 0.173              | -0.047           | -0.018            | -0.288          | <b>0.948</b>  | <b>0.858</b>  | <b>0.837</b>  | <b>1</b>      | <b>0.538</b>  | <b>0.849</b>  | <b>0.807</b>  | 0.269         | <b>0.917</b>  | <b>0.814</b>  | <b>-0.731</b> | <b>-0.642</b> | <b>-0.479</b> | 0.213             | -0.195          | <b>-0.851</b>                        | <b>-0.831</b>                       | <b>-0.689</b>                                 | <b>0.682</b>                          | <b>-0.731</b>                             | <b>-0.731</b>          |
| Iron                                          | -0.316           | 0.405         | 0.122         | 0.132              | 0.118            | 0.003             | -0.212          | <b>0.562</b>  | <b>0.718</b>  | 0.303         | <b>0.538</b>  | <b>1</b>      | <b>0.854</b>  | <b>0.821</b>  | 0.064         | <b>0.469</b>  | <b>0.531</b>  | -0.254        | -0.164        | -0.374        | 0.265             | 0.064           | <b>-0.667</b>                        | <b>-0.710</b>                       | <b>-0.605</b>                                 | <b>0.731</b>                          | <b>-0.592</b>                             | <b>-0.669</b>          |
| Copper                                        | -0.345           | <b>0.506</b>  | 0.216         | 0.113              | -0.044           | -0.036            | -0.346          | <b>0.859</b>  | <b>0.883</b>  | <b>0.705</b>  | <b>0.849</b>  | <b>0.854</b>  | <b>1</b>      | <b>0.963</b>  | 0.251         | <b>0.826</b>  | <b>0.820</b>  | <b>-0.605</b> | <b>-0.515</b> | -0.454        | 0.253             | -0.120          | <b>-0.872</b>                        | <b>-0.884</b>                       | <b>-0.796</b>                                 | <b>0.762</b>                          | <b>-0.726</b>                             | <b>-0.714</b>          |
| Zinc                                          | -0.384           | <b>0.574</b>  | 0.021         | -0.029             | -0.138           | -0.139            | -0.406          | <b>0.860</b>  | <b>0.843</b>  | <b>0.758</b>  | <b>0.807</b>  | <b>0.821</b>  | <b>0.963</b>  | <b>1</b>      | 0.285         | <b>0.851</b>  | <b>0.886</b>  | <b>-0.561</b> | <b>-0.476</b> | -0.426        | 0.279             | -0.085          | <b>-0.835</b>                        | <b>-0.837</b>                       | <b>-0.726</b>                                 | <b>0.628</b>                          | <b>-0.572</b>                             | <b>-0.628</b>          |
| Boron                                         | 0.352            | 0.387         | 0.156         | 0.155              | -0.054           | -0.283            | -0.433          | 0.367         | <b>0.473</b>  | 0.396         | 0.269         | 0.064         | 0.251         | 0.285         | <b>1</b>      | 0.336         | 0.390         | <b>-0.665</b> | <b>-0.706</b> | -0.010        | -0.140            | -0.217          | <b>-0.473</b>                        | -0.415                              | <b>-0.504</b>                                 | 0.184                                 | -0.230                                    | -0.042                 |
| Phosphorus                                    | -0.465           | 0.418         | 0.052         | -0.098             | -0.235           | -0.076            | -0.274          | <b>0.963</b>  | <b>0.753</b>  | <b>0.967</b>  | <b>0.917</b>  | <b>0.469</b>  | <b>0.826</b>  | <b>0.851</b>  | 0.336         | <b>1</b>      | <b>0.945</b>  | <b>-0.672</b> | <b>-0.642</b> | -0.264        | 0.356             | -0.090          | <b>-0.782</b>                        | <b>-0.777</b>                       | <b>-0.673</b>                                 | <b>0.547</b>                          | <b>-0.560</b>                             | <b>-0.546</b>          |
| Sulfur                                        | -0.391           | 0.447         | -0.051        | -0.082             | -0.128           | -0.155            | -0.280          | <b>0.898</b>  | <b>0.734</b>  | <b>0.915</b>  | <b>0.814</b>  | <b>0.531</b>  | <b>0.820</b>  | <b>0.886</b>  | 0.390         | <b>0.945</b>  | <b>1</b>      | <b>-0.602</b> | <b>-0.554</b> | -0.308        | 0.244             | -0.163          | <b>-0.734</b>                        | <b>-0.725</b>                       | <b>-0.659</b>                                 | 0.425                                 | -0.388                                    | -0.435                 |
| Nitrogen                                      | -0.258           | <b>-0.540</b> | <b>-0.496</b> | -0.309             | 0.000            | 0.060             | <b>0.488</b>    | <b>-0.745</b> | <b>-0.828</b> | <b>-0.680</b> | <b>-0.731</b> | -0.254        | <b>-0.605</b> | <b>-0.561</b> | <b>-0.665</b> | <b>-0.672</b> | <b>-0.602</b> | <b>1</b>      | <b>0.964</b>  | 0.359         | 0.132             | 0.455           | <b>0.807</b>                         | <b>0.749</b>                        | <b>0.754</b>                                  | <b>-0.487</b>                         | <b>0.618</b>                              | 0.447                  |
| Nitrates                                      | -0.191           | -0.377        | -0.390        | -0.202             | 0.047            | -0.013            | 0.393           | <b>-0.715</b> | <b>-0.736</b> | <b>-0.682</b> | <b>-0.642</b> | -0.164        | <b>-0.515</b> | <b>-0.476</b> | <b>-0.706</b> | <b>-0.642</b> | <b>-0.554</b> | <b>0.964</b>  | <b>1</b>      | 0.097         | -0.012            | 0.319           | <b>0.727</b>                         | <b>0.696</b>                        | <b>0.735</b>                                  | <b>-0.482</b>                         | <b>0.570</b>                              | 0.364                  |
| Nitrites                                      | -0.292           | <b>-0.695</b> | <b>-0.488</b> | -0.447             | -0.163           | 0.269             | 0.447           | -0.278        | <b>-0.513</b> | -0.153        | <b>-0.479</b> | -0.374        | -0.454        | -0.426        | -0.010        | -0.264        | -0.308        | 0.359         | 0.097         | <b>1</b>      | <b>0.533</b>      | <b>0.583</b>    | 0.426                                | 0.362                               | 0.241                                         | -0.130                                | 0.310                                     | 0.397                  |
| Chlorophyll index                             | <b>-0.834</b>    | -0.219        | -0.409        | <b>-0.513</b>      | -0.302           | 0.131             | 0.317           | 0.325         | 0.021         | 0.321         | 0.213         | 0.265         | 0.253         | 0.279         | -0.140        | 0.356         | 0.244         | 0.132         | -0.012        | <b>0.533</b>  | <b>1</b>          | <b>0.839</b>    | -0.136                               | -0.237                              | -0.124                                        | 0.422                                 | -0.249                                    | -0.317                 |
| Flavonols index                               | <b>-0.645</b>    | -0.277        | -0.463        | <b>-0.512</b>      | -0.210           | 0.092             | 0.397           | -0.123        | -0.325        | -0.103        | -0.195        | 0.064         | -0.120        | -0.085        | -0.217        | -0.090        | -0.163        | 0.455         | 0.319         | <b>0.583</b>  | <b>0.839</b>      | <b>1</b>        | 0.205                                | 0.098                               | 0.193                                         | 0.192                                 | 0.020                                     | -0.161                 |
| Anthocyanin reflectance index (ARI1)          | 0.128            | -0.277        | -0.386        | -0.144             | 0.088            | 0.268             | <b>0.513</b>    | <b>-0.845</b> | <b>-0.944</b> | <b>-0.673</b> | <b>-0.851</b> | <b>-0.667</b> | <b>-0.872</b> | <b>-0.835</b> | <b>-0.473</b> | <b>-0.782</b> | <b>-0.734</b> | <b>0.807</b>  | <b>0.727</b>  | 0.468         | -0.136            | 0.205           | <b>1</b>                             | <b>0.981</b>                        | <b>0.892</b>                                  | <b>-0.737</b>                         | <b>0.761</b>                              | <b>0.646</b>           |
| Carotenoid reflectance index (CRI2)           | 0.225            | <b>-0.551</b> | -0.341        | -0.098             | 0.051            | 0.210             | 0.450           | <b>-0.848</b> | <b>-0.924</b> | <b>-0.664</b> | <b>-0.831</b> | <b>-0.710</b> | <b>-0.884</b> | <b>-0.837</b> | -0.415        | <b>-0.777</b> | <b>-0.725</b> | <b>0.749</b>  | <b>0.696</b>  | 0.362         | -0.237            | 0.098           | <b>0.981</b>                         | <b>1</b>                            | <b>0.914</b>                                  | <b>-0.820</b>                         | <b>0.768</b>                              | <b>0.680</b>           |
| Normalized difference vegetation index (NDVI) | 0.085            | -0.398        | -0.349        | -0.147             | 0.034            | 0.216             | 0.465           | <b>-0.732</b> | <b>-0.828</b> | <b>-0.589</b> | <b>-0.689</b> | <b>-0.605</b> | <b>-0.796</b> | <b>-0.726</b> | <b>-0.504</b> | <b>-0.673</b> | <b>-0.659</b> | <b>0.754</b>  | <b>0.735</b>  | 0.241         | -0.124            | 0.193           | <b>0.892</b>                         | <b>0.914</b>                        | <b>1</b>                                      | <b>-0.728</b>                         | <b>0.660</b>                              | <b>0.472</b>           |
| Photochemical reflectance index (PRI)         | -0.326           | 0.297         | 0.410         | 0.179              | 0.114            | 0.152             | -0.151          | <b>0.671</b>  | <b>0.737</b>  | 0.410         | <b>0.682</b>  | <b>0.731</b>  | <b>0.762</b>  | <b>0.628</b>  | 0.184         | <b>0.547</b>  | 0.425         | <b>-0.487</b> | <b>-0.482</b> | -0.130        | 0.422             | 0.192           | <b>-0.737</b>                        | <b>-0.820</b>                       | <b>-0.728</b>                                 | <b>1</b>                              | <b>-0.866</b>                             | <b>-0.804</b>          |
| Plant senescence reflectance index (PSRI)     | 0.147            | -0.374        | <b>-0.656</b> | -0.337             | 0.067            | -0.162            | 0.246           | <b>-0.659</b> | <b>-0.755</b> | -0.414        | <b>-0.731</b> | <b>-0.592</b> | <b>-0.726</b> | <b>-0.572</b> | -0.230        | <b>-0.560</b> | -0.388        | <b>0.618</b>  | <b>0.570</b>  | 0.310         | -0.249            | 0.020           | <b>0.761</b>                         | <b>0.768</b>                        | <b>0.660</b>                                  | <b>-0.866</b>                         | <b>1</b>                                  | <b>0.705</b>           |
| Water band index (WBI)                        | 0.308            | -0.441        | -0.301        | -0.149             | -0.230           | -0.257            | 0.023           | <b>-0.647</b> | <b>-0.690</b> | -0.449        | <b>-0.731</b> | <b>-0.669</b> | <b>-0.714</b> | <b>-0.628</b> | -0.042        | <b>-0.546</b> | -0.435        | 0.447         | 0.364         | 0.397         | -0.317            | -0.161          | <b>0.646</b>                         | <b>0.680</b>                        | <b>0.472</b>                                  | <b>-0.804</b>                         | <b>0.705</b>                              | <b>1</b>               |

Values in bold are different from 0 with a significance level alpha=0.05.

**Table S5.** Effect of different blue - red light ratio in LED lighting on the bioconcentration factor of kale microgreens.

| Treatment | BCF <sub>P</sub>   | BCF <sub>K</sub>   | BCF <sub>Ca</sub> | BCF <sub>Mg</sub> | BCF <sub>S</sub> | BCF <sub>Mn</sub> | BCF <sub>Fe</sub> | BCF <sub>Zn</sub> | BCF <sub>Cu</sub>  |
|-----------|--------------------|--------------------|-------------------|-------------------|------------------|-------------------|-------------------|-------------------|--------------------|
| B0R100    | 19.53 ± 1.17<br>ab | 10.04 ± 0.59<br>ab | 2.86 ± 0.25 ab    | 5.80 ± 0.28 a     | 14.23 ± 1.14 b   | 8.71 ± 0.25 bc    | 2.86 ± 0.08 bc    | 5.32 ± 0.26 ab    | 13.01 ± 0.46 b     |
| B10R90    | 18.26 ± 1.81<br>ab | 8.66 ± 0.48 c      | 2.53 ± 0.13 b     | 5.44 ± 0.64 ab    | 13.13 ± 0.88 b   | 8.07 ± 0.41 cd    | 2.43 ± 0.07 d     | 5.21 ± 0.63 ab    | 12.94 ± 1.01 b     |
| B25R75    | 19.09 ± 0.20<br>ab | 9.88 ± 0.14 b      | 2.93 ± 0.07 ab    | 5.74 ± 0.21 ab    | 14.04 ± 0.12 b   | 8.22 ± 0.07 c     | 2.54 ± 0.02 d     | 5.10 ± 0.02 b     | 12.29 ± 0.07 b     |
| B50R50    | 18.14 ± 0.18<br>ab | 9.07 ± 0.12 bc     | 2.74 ± 0.04 ab    | 5.29 ± 0.11 bc    | 13.71 ± 0.06 b   | 8.51 ± 0.12 bc    | 2.66 ± 0.03 c     | 5.04 ± 0.03 b     | 13.31 ± 0.16<br>ab |
| B75R25    | 21.74 ± 0.43 a     | 12.13 ± 0.17 a     | 3.54 ± 0.07 a     | 5.33 ± 0.21 bc    | 16.30 ± 0.02 a   | 10.66 ± 0.18 a    | 3.29 ± 0.04 a     | 6.51 ± 0.07 a     | 15.17 ± 0.18 a     |
| B100R0    | 17.81 ± 0.30<br>ab | 8.78 ± 0.15 c      | 3.03 ± 0.08 a     | 4.39 ± 0.19 c     | 14.15 ± 0.10 b   | 8.91 ± 0.15 ab    | 2.98 ± 0.04 b     | 5.45 ± 0.03 ab    | 13.29 ± 0.07<br>ab |

B0R100, B10R90, B25R75, B50R50, B75R25, B100R0 – percentage of blue (B) and red (R) light. BCF - bioconcentration factor; P – phosphorus, K - potassium, Ca – calcium, Mg – magnesium, S – sulfur, Fe – iron, Zn – zinc, Mn – manganese, Cu – copper, B – boron. All values in the Table are expressed as mean ± standard error (n = 3). Means with different letters are significantly different at the P < 0.05 level by Tukey's honestly significant difference test.

**Table S6.** Effect of different blue - red light ratio in LED lighting on the translocation factor of kale microgreens.

| Treatment | TF <sub>P</sub> | TF <sub>K</sub> | TF <sub>Ca</sub> | TF <sub>Mg</sub> | TF <sub>S</sub> | TF <sub>Mn</sub> | TF <sub>Fe</sub> | TF <sub>Zn</sub> | TF <sub>Cu</sub> |
|-----------|-----------------|-----------------|------------------|------------------|-----------------|------------------|------------------|------------------|------------------|
| B0R100    | 0.88 ± 0.07 a   | 0.80 ± 0.06 ab  | 3.14 ± 0.29 bc   | 1.07 ± 0.06 b    | 0.58 ± 0.07 c   | 3.51 ± 0.12 ab   | 0.31 ± 0.01 c    | 0.53 ± 0.03 a    | 0.22 ± 0.01 c    |
| B10R90    | 0.91 ± 0.12 a   | 0.87 ± 0.07 a   | 3.66 ± 0.23 a    | 1.11 ± 0.17 b    | 0.67 ± 0.04 bc  | 3.56 ± 0.25 ab   | 0.40 ± 0.02 a    | 0.54 ± 0.09 a    | 0.23 ± 0.03 c    |
| B25R75    | 1.01 ± 0.02 a   | 0.84 ± 0.02 ab  | 3.50 ± 0.11 ab   | 1.12 ± 0.05 b    | 0.75 ± 0.02 ab  | 3.82 ± 0.05 a    | 0.37 ± 0.01 ab   | 0.59 ± 0.01 a    | 0.27 ± 0.01 bc   |
| B50R50    | 0.97 ± 0.02 a   | 0.84 ± 0.01 ab  | 3.48 ± 0.06 ab   | 1.12 ± 0.01 b    | 0.76 ± 0.02 ab  | 3.43 ± 0.01 bc   | 0.33 ± 0.02 bc   | 0.58 ± 0.05 a    | 0.30 ± 0.01 ab   |
| B75R25    | 0.96 ± 0.04 a   | 0.73 ± 0.02 b   | 2.97 ± 0.13 c    | 1.31 ± 0.08 ab   | 0.79 ± 0.02 a   | 3.16 ± 0.10 c    | 0.38 ± 0.01 a    | 0.56 ± 0.01 a    | 0.32 ± 0.04 ab   |
| B100R0    | 1.05 ± 0.02 a   | 0.91 ± 0.03 a   | 3.11 ± 0.11 bc   | 1.40 ± 0.07 a    | 0.83 ± 0.01 a   | 3.65 ± 0.04 ab   | 0.34 ± 0.02 bc   | 0.59 ± 0.02 a    | 0.35 ± 0.01 a    |

B0R100, B10R90, B25R75, B50R50, B75R25, B100R0 – percentage of blue (B) and red (R) light. TF - translocation factor; N – nitrogen, P – phosphorus, K - potassium, Ca – calcium, Mg – magnesium, S – sulfur, Fe – iron, Zn – zinc, Mn – manganese, Cu – copper, B – boron. All values in the Table are expressed as mean ± standard error (n = 3). Means with different letters are significantly different at the P < 0.05 level by Tukey's honestly significant difference test.

**Table S7.** Eigenvalue, factor scores, and contribution of the first six principal component axes to variation in kale microgreens under different blue - red light ratio LED lighting.

| Factors                                       | F1     | F2     | F3     | F4     | F5     | F6     |
|-----------------------------------------------|--------|--------|--------|--------|--------|--------|
| Eigenvalue                                    | 8.946  | 5.513  | 3.766  | 2.330  | 1.910  | 1.546  |
| Variability (%)                               | 31.948 | 19.690 | 13.452 | 8.321  | 6.820  | 5.523  |
| Cumulative variability (%)                    |        |        | 85.754 |        |        |        |
| Nitrogen                                      | -0.094 | 0.272  | 0.196  | 0.256  | -0.194 | 0.193  |
| Phosphorus                                    | 0.287  | 0.069  | 0.077  | 0.015  | 0.246  | -0.133 |
| Potassium                                     | 0.251  | -0.090 | 0.242  | 0.107  | 0.166  | -0.059 |
| Calcium                                       | 0.144  | 0.312  | 0.120  | 0.002  | 0.286  | -0.099 |
| Magnesium                                     | 0.238  | -0.034 | 0.168  | 0.235  | 0.194  | -0.059 |
| Sulfur                                        | 0.300  | 0.127  | -0.050 | -0.133 | 0.023  | -0.051 |
| Manganese                                     | 0.256  | -0.061 | 0.279  | 0.036  | -0.059 | 0.092  |
| Iron                                          | 0.193  | -0.019 | -0.326 | 0.045  | -0.242 | 0.139  |
| Copper                                        | 0.295  | 0.067  | -0.052 | -0.201 | 0.015  | 0.162  |
| Zinc                                          | 0.283  | 0.037  | -0.127 | -0.046 | -0.076 | 0.093  |
| Boron                                         | 0.200  | 0.103  | 0.068  | 0.001  | -0.213 | 0.347  |
| Nitrates                                      | -0.100 | 0.266  | 0.197  | 0.262  | -0.196 | 0.192  |
| Nitrites                                      | 0.230  | 0.053  | -0.146 | -0.392 | 0.083  | 0.017  |
| Hypocotyl length                              | 0.102  | -0.237 | 0.326  | 0.106  | -0.222 | 0.089  |
| Root length                                   | 0.034  | -0.135 | 0.326  | -0.116 | 0.021  | -0.172 |
| Leaf area                                     | -0.092 | -0.177 | 0.298  | -0.304 | 0.002  | 0.011  |
| Shoot fresh weight                            | 0.063  | 0.174  | 0.367  | -0.180 | -0.154 | 0.023  |
| Shoot dry weight                              | -0.077 | 0.283  | 0.265  | -0.087 | -0.134 | 0.128  |
| Root fresh weight                             | -0.119 | 0.354  | 0.001  | -0.042 | 0.142  | 0.007  |
| Root dry weight                               | -0.169 | 0.320  | -0.054 | -0.075 | 0.060  | -0.056 |
| Chlorophyll index                             | 0.028  | 0.323  | -0.042 | -0.305 | -0.221 | -0.179 |
| Flavonols index                               | 0.261  | 0.124  | -0.150 | -0.061 | -0.287 | 0.026  |
| Anthocyanin reflectance index (ARI1)          | -0.150 | 0.030  | -0.087 | -0.126 | 0.239  | 0.583  |
| Carotenoid reflectance index (CRI2)           | -0.229 | -0.123 | -0.013 | -0.160 | -0.049 | 0.231  |
| Normalized difference vegetation index (NDVI) | -0.236 | -0.127 | 0.032  | -0.116 | -0.104 | -0.105 |
| Photochemical reflectance index (PRI)         | -0.143 | 0.211  | 0.013  | -0.053 | -0.217 | -0.438 |
| Plant senescence reflectance index (PSRI)     | -0.058 | 0.247  | 0.006  | 0.188  | 0.443  | 0.073  |
| Water band index (WBI)                        | 0.094  | 0.048  | -0.204 | 0.476  | -0.189 | -0.119 |

**Table S8.** Correlation matrix (Pearson (n)) of kale microgreens under different blue - red light ratio LED lighting.

| Variables                                     | Hypocotyl length | Root length  | Leaf area     | Shoot fresh weight | Shoot dry weight | Root fresh weight | Root dry weight | Magnesium     | Potassium     | Calcium       | Manganese     | Iron          | Copper        | Zinc          | Boron         | Phosphorus    | Sulfur        | Nitrogen      | Nitrates      | Nitrites      | Chlorophyll index | Flavonols index | Anthocyanin reflectance index (ARI1) | Carotenoid reflectance index (CRI2) | Normalized difference vegetation index (NDVI) | Photochemical reflectance index (PRI) | Plant senescence reflectance index (PSRI) | Water band index (WBI) |
|-----------------------------------------------|------------------|--------------|---------------|--------------------|------------------|-------------------|-----------------|---------------|---------------|---------------|---------------|---------------|---------------|---------------|---------------|---------------|---------------|---------------|---------------|---------------|-------------------|-----------------|--------------------------------------|-------------------------------------|-----------------------------------------------|---------------------------------------|-------------------------------------------|------------------------|
| Hypocotyl length                              | <b>1</b>         | <b>0.494</b> | 0.353         | 0.372              | -0.050           | <b>-0.652</b>     | <b>-0.696</b>   | 0.422         | <b>0.623</b>  | -0.236        | <b>0.749</b>  | -0.074        | 0.070         | 0.132         | 0.161         | 0.132         | 0.003         | -0.042        | -0.038        | -0.144        | -0.464            | 0.029           | -0.299                               | 0.010                               | 0.035                                         | -0.346                                | <b>-0.480</b>                             | -0.036                 |
| Root length                                   | <b>0.494</b>     | <b>1</b>     | <b>0.583</b>  | 0.301              | 0.029            | -0.104            | -0.293          | 0.126         | 0.327         | -0.109        | 0.380         | -0.339        | 0.052         | -0.042        | -0.020        | 0.092         | -0.032        | -0.067        | -0.066        | -0.029        | -0.214            | -0.240          | -0.359                               | -0.180                              | -0.011                                        | -0.207                                | -0.222                                    | -0.336                 |
| Leaf area                                     | 0.353            | <b>0.583</b> | <b>1</b>      | 0.221              | 0.127            | -0.262            | -0.187          | -0.121        | 0.006         | -0.320        | 0.059         | <b>-0.511</b> | -0.183        | -0.465        | -0.040        | -0.215        | -0.324        | -0.113        | -0.105        | -0.151        | -0.153            | <b>-0.488</b>   | 0.068                                | 0.240                               | 0.410                                         | -0.069                                | -0.296                                    | <b>-0.695</b>          |
| Shoot fresh weight                            | 0.372            | 0.301        | 0.221         | <b>1</b>           | <b>0.682</b>     | 0.214             | 0.168           | 0.118         | 0.334         | 0.458         | <b>0.506</b>  | -0.343        | 0.229         | 0.152         | 0.275         | 0.248         | 0.273         | 0.391         | 0.381         | 0.118         | 0.451             | 0.188           | -0.142                               | -0.118                              | -0.047                                        | 0.191                                 | 0.073                                     | -0.270                 |
| Shoot dry weight                              | -0.050           | 0.029        | 0.127         | <b>0.682</b>       | <b>1</b>         | <b>0.644</b>      | <b>0.671</b>    | -0.043        | -0.091        | 0.420         | 0.016         | -0.402        | -0.144        | -0.227        | 0.214         | -0.139        | -0.115        | <b>0.628</b>  | <b>0.626</b>  | -0.149        | <b>0.520</b>      | -0.010          | 0.109                                | 0.126                               | -0.039                                        | 0.349                                 | 0.209                                     | -0.214                 |
| Root fresh weight                             | <b>-0.652</b>    | -0.104       | -0.262        | 0.214              | <b>0.644</b>     | <b>1</b>          | <b>0.885</b>    | -0.297        | -0.426        | <b>0.500</b>  | -0.402        | -0.273        | -0.164        | -0.182        | -0.091        | -0.152        | -0.086        | <b>0.550</b>  | <b>0.545</b>  | -0.063        | <b>0.527</b>      | -0.106          | 0.262                                | -0.009                              | -0.056                                        | 0.419                                 | <b>0.599</b>                              | -0.098                 |
| Root dry weight                               | <b>-0.696</b>    | -0.293       | -0.187        | 0.168              | <b>0.671</b>     | <b>0.885</b>      | <b>1</b>        | -0.389        | <b>-0.534</b> | 0.316         | <b>-0.615</b> | -0.303        | -0.322        | -0.312        | -0.158        | -0.323        | -0.256        | 0.414         | 0.415         | -0.166        | <b>0.565</b>      | -0.152          | 0.269                                | 0.148                               | 0.130                                         | <b>0.518</b>                          | <b>0.474</b>                              | -0.047                 |
| Magnesium                                     | 0.422            | 0.126        | -0.121        | 0.118              | -0.043           | -0.297            | -0.389          | <b>1</b>      | <b>0.895</b>  | <b>0.480</b>  | <b>0.714</b>  | 0.139         | 0.409         | 0.396         | 0.403         | <b>0.762</b>  | <b>0.475</b>  | -0.132        | -0.139        | 0.202         | -0.257            | 0.324           | -0.421                               | <b>-0.527</b>                       | <b>-0.540</b>                                 | -0.383                                | -0.009                                    | 0.246                  |
| Potassium                                     | <b>0.623</b>     | 0.327        | 0.006         | 0.334              | -0.091           | -0.426            | <b>-0.534</b>   | <b>0.895</b>  | <b>1</b>      | 0.403         | <b>0.846</b>  | 0.025         | <b>0.491</b>  | 0.444         | 0.352         | <b>0.782</b>  | <b>0.516</b>  | -0.237        | -0.245        | 0.279         | -0.248            | 0.306           | -0.414                               | -0.435                              | <b>-0.488</b>                                 | -0.436                                | -0.125                                    | 0.094                  |
| Calcium                                       | -0.236           | -0.109       | -0.320        | 0.458              | 0.420            | <b>0.500</b>      | 0.316           | <b>0.480</b>  | 0.403         | <b>1</b>      | 0.347         | -0.094        | 0.429         | 0.285         | 0.254         | <b>0.689</b>  | <b>0.612</b>  | 0.304         | 0.286         | 0.388         | <b>0.490</b>      | 0.344           | -0.104                               | <b>-0.524</b>                       | <b>-0.517</b>                                 | 0.183                                 | <b>0.560</b>                              | 0.009                  |
| Manganese                                     | <b>0.749</b>     | 0.380        | 0.059         | <b>0.506</b>       | 0.016            | -0.402            | <b>-0.615</b>   | <b>0.714</b>  | <b>0.846</b>  | 0.347         | <b>1</b>      | 0.176         | <b>0.579</b>  | <b>0.568</b>  | 0.462         | <b>0.679</b>  | <b>0.595</b>  | -0.010        | -0.022        | 0.342         | -0.133            | 0.439           | -0.361                               | -0.428                              | -0.396                                        | -0.381                                | -0.230                                    | -0.004                 |
| Iron                                          | -0.074           | -0.339       | <b>-0.511</b> | -0.343             | -0.402           | -0.273            | -0.303          | 0.139         | 0.025         | -0.094        | 0.176         | <b>1</b>      | <b>0.584</b>  | <b>0.749</b>  | 0.364         | 0.254         | <b>0.556</b>  | -0.225        | -0.235        | <b>0.494</b>  | 0.034             | <b>0.721</b>    | -0.167                               | -0.382                              | -0.362                                        | -0.268                                | -0.292                                    | 0.435                  |
| Copper                                        | 0.070            | 0.052        | -0.183        | 0.229              | -0.144           | -0.164            | -0.322          | 0.409         | <b>0.491</b>  | 0.429         | <b>0.579</b>  | <b>0.584</b>  | <b>1</b>      | <b>0.837</b>  | <b>0.656</b>  | <b>0.735</b>  | <b>0.924</b>  | -0.225        | -0.247        | <b>0.830</b>  | 0.287             | <b>0.774</b>    | -0.158                               | <b>-0.589</b>                       | <b>-0.647</b>                                 | -0.378                                | -0.068                                    | 0.028                  |
| Zinc                                          | 0.132            | -0.042       | -0.465        | 0.152              | -0.227           | -0.182            | -0.312          | 0.396         | 0.444         | 0.285         | <b>0.568</b>  | <b>0.749</b>  | <b>0.837</b>  | <b>1</b>      | <b>0.482</b>  | <b>0.634</b>  | <b>0.822</b>  | -0.250        | -0.268        | <b>0.685</b>  | 0.125             | <b>0.784</b>    | -0.271                               | <b>-0.551</b>                       | <b>-0.497</b>                                 | -0.352                                | -0.099                                    | 0.286                  |
| Boron                                         | 0.161            | -0.020       | -0.040        | 0.275              | 0.214            | -0.091            | -0.158          | 0.403         | 0.352         | 0.254         | 0.462         | 0.364         | <b>0.656</b>  | <b>0.482</b>  | <b>1</b>      | 0.435         | <b>0.523</b>  | 0.188         | 0.176         | 0.313         | 0.266             | <b>0.597</b>    | -0.134                               | -0.368                              | <b>-0.606</b>                                 | -0.285                                | -0.119                                    | 0.173                  |
| Phosphorus                                    | 0.132            | 0.092        | -0.215        | 0.248              | -0.139           | -0.152            | -0.323          | <b>0.762</b>  | <b>0.782</b>  | <b>0.689</b>  | <b>0.679</b>  | 0.254         | <b>0.735</b>  | <b>0.634</b>  | 0.435         | <b>1</b>      | <b>0.853</b>  | -0.190        | -0.208        | <b>0.549</b>  | 0.126             | <b>0.502</b>    | -0.386                               | <b>-0.710</b>                       | <b>-0.638</b>                                 | -0.244                                | 0.134                                     | 0.120                  |
| Sulfur                                        | 0.003            | -0.032       | -0.324        | 0.273              | -0.115           | -0.086            | -0.256          | <b>0.475</b>  | <b>0.516</b>  | <b>0.612</b>  | <b>0.595</b>  | <b>0.556</b>  | <b>0.924</b>  | <b>0.822</b>  | <b>0.523</b>  | <b>0.853</b>  | <b>1</b>      | -0.150        | -0.174        | <b>0.798</b>  | 0.405             | <b>0.801</b>    | -0.337                               | <b>-0.708</b>                       | <b>-0.640</b>                                 | -0.147                                | 0.014                                     | 0.131                  |
| Nitrogen                                      | -0.042           | -0.067       | -0.113        | 0.391              | <b>0.628</b>     | <b>0.550</b>      | 0.414           | -0.132        | -0.237        | 0.304         | -0.010        | -0.225        | -0.225        | -0.250        | 0.188         | -0.190        | -0.150        | <b>1</b>      | <b>1.000</b>  | <b>-0.471</b> | 0.259             | -0.095          | 0.136                                | -0.095                              | 0.005                                         | 0.413                                 | 0.428                                     | 0.093                  |
| Nitrates                                      | -0.038           | -0.066       | -0.105        | 0.381              | <b>0.626</b>     | <b>0.545</b>      | 0.415           | -0.139        | -0.245        | 0.286         | -0.022        | -0.235        | -0.247        | -0.268        | 0.176         | -0.208        | -0.174        | <b>1.000</b>  | <b>1</b>      | <b>-0.492</b> | 0.245             | -0.113          | 0.138                                | -0.080                              | 0.019                                         | 0.414                                 | 0.423                                     | 0.095                  |
| Nitrites                                      | -0.144           | -0.029       | -0.151        | 0.118              | -0.149           | -0.063            | -0.166          | 0.202         | 0.279         | 0.388         | 0.342         | <b>0.494</b>  | <b>0.830</b>  | <b>0.685</b>  | 0.313         | <b>0.549</b>  | <b>0.798</b>  | <b>-0.471</b> | <b>-0.492</b> | <b>1</b>      | 0.405             | <b>0.689</b>    | -0.072                               | -0.352                              | -0.468                                        | -0.249                                | -0.162                                    | -0.136                 |
| Chlorophyll index                             | -0.464           | -0.214       | -0.153        | 0.451              | <b>0.520</b>     | <b>0.527</b>      | <b>0.565</b>    | -0.257        | -0.248        | <b>0.490</b>  | -0.133        | 0.034         | 0.287         | 0.125         | 0.266         | 0.126         | 0.405         | 0.259         | 0.245         | 0.405         | <b>1</b>          | <b>0.476</b>    | -0.123                               | -0.184                              | -0.181                                        | <b>0.589</b>                          | 0.060                                     | -0.045                 |
| Flavonols index                               | 0.029            | -0.240       | <b>-0.488</b> | 0.188              | -0.010           | -0.106            | -0.152          | 0.324         | 0.306         | 0.344         | 0.439         | <b>0.721</b>  | <b>0.774</b>  | <b>0.784</b>  | <b>0.597</b>  | <b>0.502</b>  | <b>0.801</b>  | -0.095        | -0.113        | <b>0.689</b>  | <b>0.476</b>      | <b>1</b>        | -0.363                               | <b>-0.515</b>                       | <b>-0.581</b>                                 | -0.111                                | -0.247                                    | 0.430                  |
| Anthocyanin reflectance index (ARI1)          | -0.299           | -0.359       | 0.068         | -0.142             | 0.109            | 0.262             | 0.269           | -0.421        | -0.414        | -0.104        | -0.361        | -0.167        | -0.158        | -0.271        | -0.134        | -0.386        | -0.337        | 0.136         | 0.138         | -0.072        | -0.123            | -0.363          | <b>1</b>                             | <b>0.504</b>                        | 0.266                                         | -0.210                                | 0.308                                     | -0.375                 |
| Carotenoid reflectance index (CRI2)           | 0.010            | -0.180       | 0.240         | -0.118             | 0.126            | -0.009            | 0.148           | <b>-0.527</b> | -0.435        | <b>-0.524</b> | -0.428        | -0.382        | <b>-0.589</b> | <b>-0.551</b> | -0.368        | <b>-0.710</b> | <b>-0.708</b> | -0.095        | -0.080        | -0.352        | -0.184            | <b>-0.515</b>   | <b>0.504</b>                         | <b>1</b>                            | <b>0.506</b>                                  | 0.098                                 | -0.187                                    | -0.426                 |
| Normalized difference vegetation index (NDVI) | 0.035            | -0.011       | 0.410         | -0.047             | -0.039           | -0.056            | 0.130           | <b>-0.540</b> | <b>-0.488</b> | <b>-0.517</b> | -0.396        | -0.362        | <b>-0.647</b> | <b>-0.497</b> | <b>-0.606</b> | <b>-0.638</b> | <b>-0.640</b> | 0.005         | 0.019         | -0.468        | -0.181            | <b>-0.581</b>   | 0.266                                | <b>0.506</b>                        | <b>1</b>                                      | 0.354                                 | -0.134                                    | -0.375                 |
| Photochemical reflectance index (PRI)         | -0.346           | -0.207       | -0.069        | 0.191              | 0.349            | 0.419             | <b>0.518</b>    | -0.383        | -0.436        | 0.183         | -0.381        | -0.268        | -0.378        | -0.352        | -0.285        | -0.244        | -0.147        | 0.413         | 0.414         | -0.249        | <b>0.589</b>      | -0.111          | -0.210                               | 0.098                               | 0.354                                         | <b>1</b>                              | 0.137                                     | -0.080                 |
| Plant senescence reflectance index (PSRI)     | <b>-0.480</b>    | -0.222       | -0.296        | 0.073              | 0.209            | <b>0.599</b>      | <b>0.474</b>    | -0.009        | -0.125        | <b>0.560</b>  | -0.230        | -0.292        | -0.068        | -0.099        | -0.119        | 0.134         | 0.014         | 0.428         | 0.423         | -0.162        | 0.060             | -0.247          | 0.308                                | -0.187                              | -0.134                                        | 0.137                                 | <b>1</b>                                  | 0.030                  |
| Water band index (WBI)                        | -0.036           | -0.336       | <b>-0.695</b> | -0.270             | -0.214           | -0.098            | -0.047          | 0.246         | 0.094         | 0.009         | -0.004        | 0.435         | 0.028         | 0.286         | 0.173         | 0.120         | 0.131         | 0.093         | 0.095         | -0.136        | -0.045            | 0.430           | -0.375                               | -0.426                              | -0.375                                        | -0.080                                | 0.030                                     | <b>1</b>               |

Values in bold are different from 0 with a significance level alpha=0.05.
